# Supplementary material for: Rotating robots move collectively and self-organize
Source: PubMed Central journal article supplement (PMC5834624; doi:10.1038/s41467-018-03154-7), 2018-03-02
Supplement: 41467_2018_3154_MOESM1_ESM.pdf [file 41467_2018_3154_MOESM1_ESM.pdf]

—Supplementary Information—  
**Rotating Robots Move Collectively and Self-Organize**

Christian Scholz,<sup>1,2,\*</sup> Michael Engel,<sup>1,†</sup> and Thorsten Pöschel<sup>1,‡</sup>

<sup>1</sup>*Institute for Multiscale Simulation, Friedrich-Alexander-University Erlangen-Nürnberg, 91052 Erlangen, Germany*

<sup>2</sup>*Institut für Theoretische Physik II: Weiche Materie,  
Heinrich-Heine-Universität Düsseldorf, D-40225 Düsseldorf, Germany*

(Dated: January 20, 2018)

\* christian.scholz@hhu.de

† michael.engel@fau.de

‡ thorsten.poeschel@fau.de

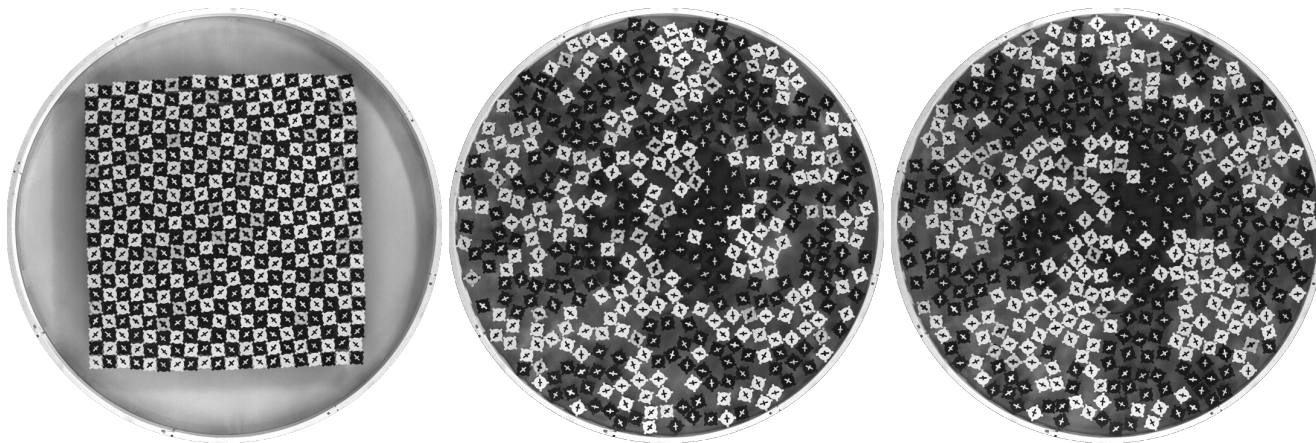

**Supplementary Figure 1.** Snapshots from Supplementary Movie 1 at times 0 s, 30 s and 60 s.

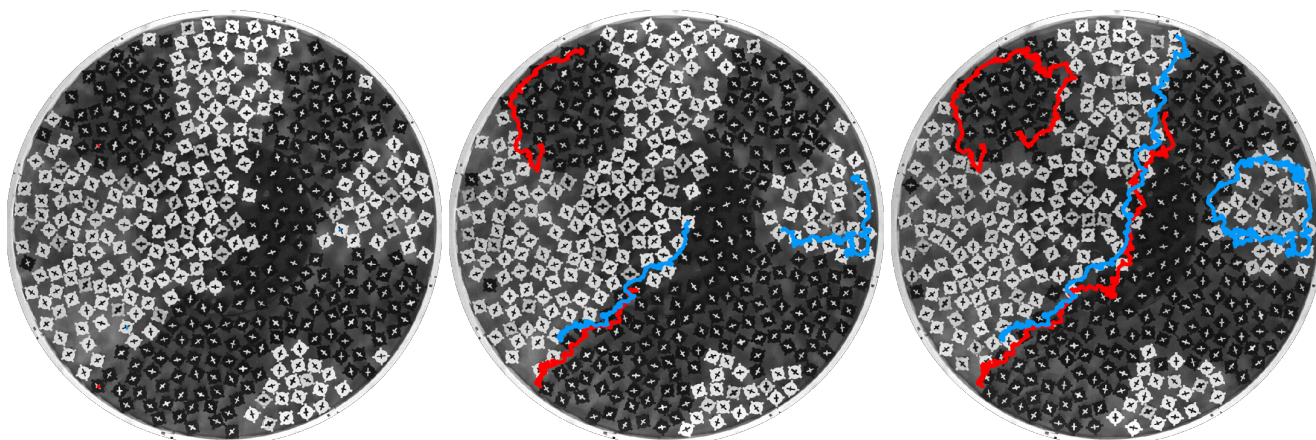

**Supplementary Figure 2.** Snapshots from Supplementary Movie 2 at times 0 s, 26 s and 52 s.

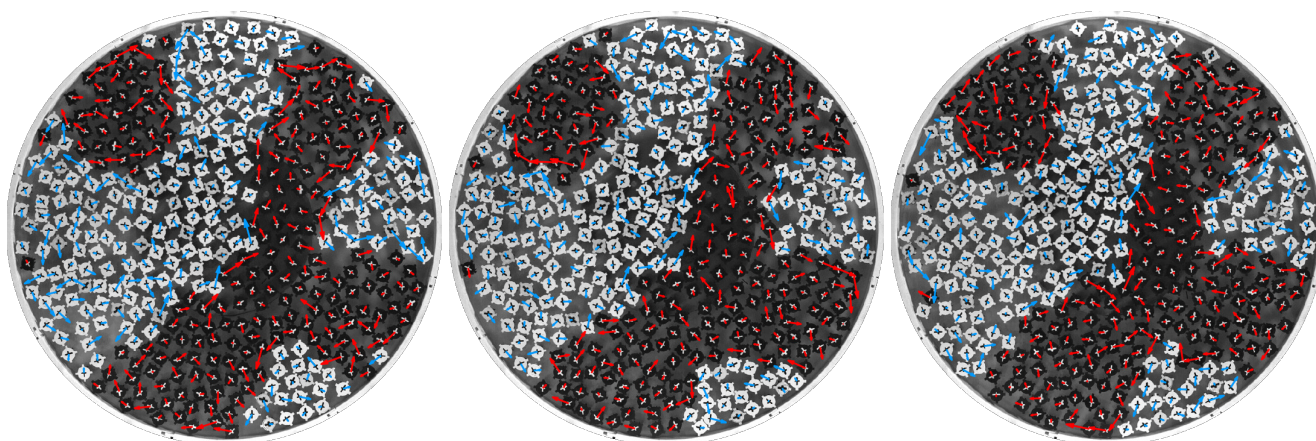

**Supplementary Figure 3.** Snapshots from Supplementary Movie 3 at times 0 s, 13 s and 26 s.

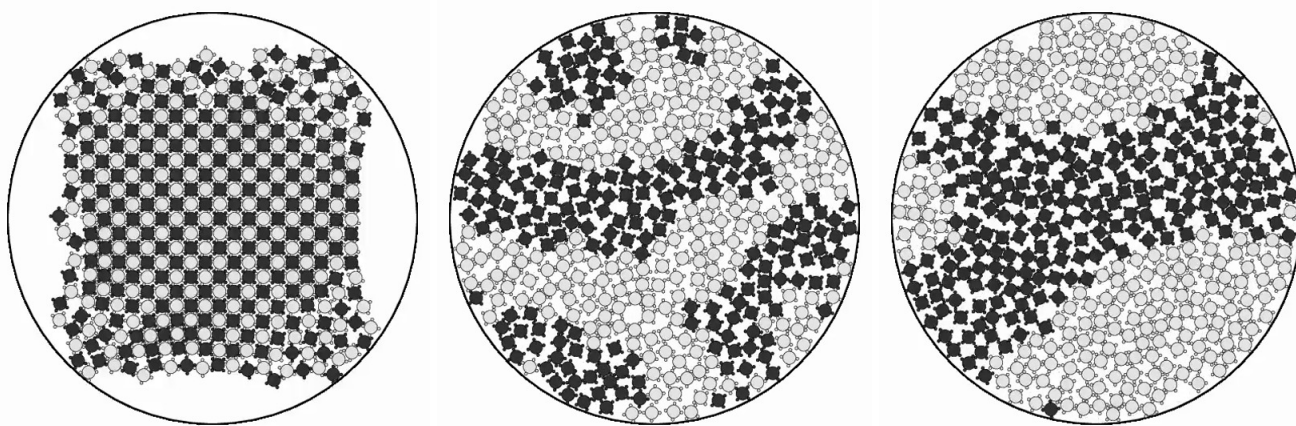

**Supplementary Figure 4.** Snapshots from Supplementary Movie 4 (after 0 s, 100 s, 1000 s real time).

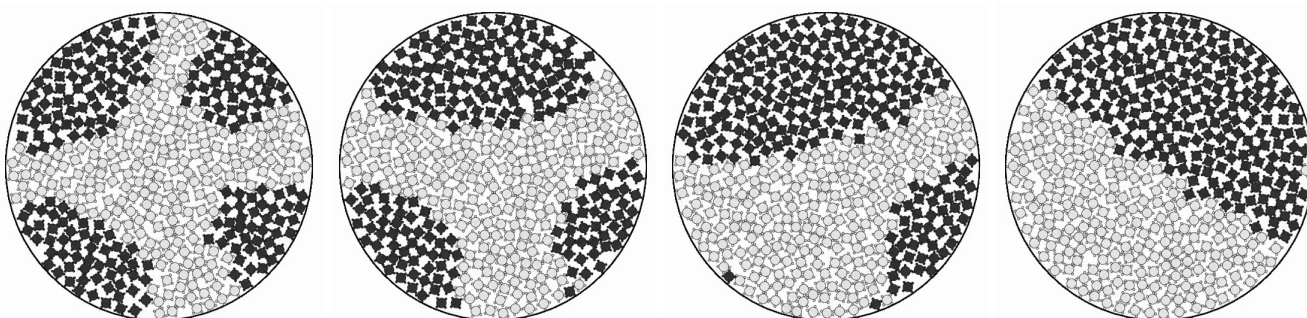

**Supplementary Figure 5.** Snapshots from Supplementary Movie 5 (after 500 s, 1000 s, 2000 s, 4000 s real time).

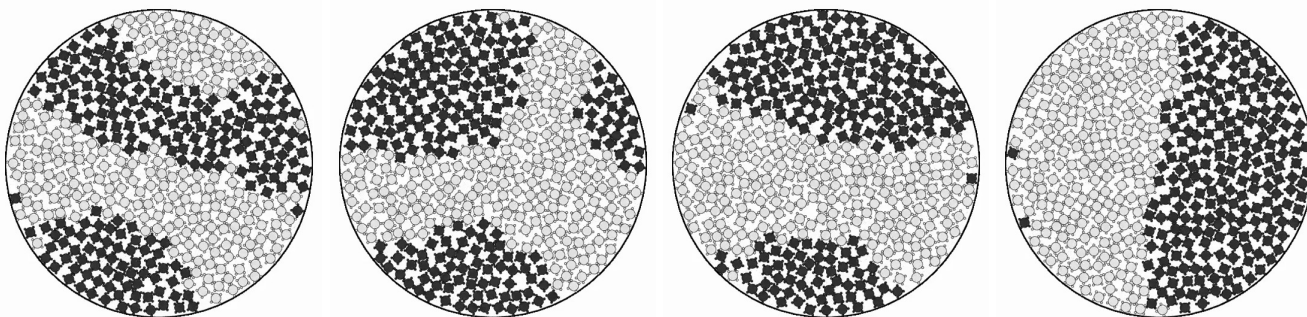

**Supplementary Figure 6.** Snapshots from Supplementary Movie 6 (after 500 s, 2000 s, 3500 s, 7000 s real time).
