# Supplementary material for: Rotating robots move collectively and self-organize
Source: PubMed Central journal article supplement (PMC5834624; doi:10.1038/s41467-018-03154-7), 2018-03-02
Supplement: 41467_2018_3154_MOESM3_ESM.pdf [file 41467_2018_3154_MOESM3_ESM.pdf]

## **Description of Additional Supplementary Files**

File Name: Supplementary Movie 1

Description: Initial Segregation

Experimental demonstration of demixing of a binary mixture of rotors from the initial state in real time.

File Name: Supplementary Movie 2

Description: Interface Motion

Trajectories of two clockwise and two anti-clockwise spinning rotors at interfaces in real time.

File Name: Supplementary Movie 3

Description: Particle Velocities

Velocities of particles in the demixed state in real time.

File Name: Supplementary Movie 4

Description: Demixing in simulations

Langevin dynamics simulation of the demixing process. Video is time lapsed by a factor of 15.

File Name: Supplementary Movie 5

Description: Metastable states (four- and three-fold)

Langevin dynamics simulation showing four- and three-fold symmetric metastable states. Video is time lapsed by a factor of 150.

File Name: Supplementary Movie 6

Description: Metastable states (two- and three-fold)

Langevin dynamics simulation showing two- and three-fold symmetric metastable states. Video is time lapsed by a factor of 150.

File Name: Supplementary Data 1

Description: Langevin dynamics simulation code

C++ code of the Langevin dynamics simulations.

File Name: Supplementary Data 2

Description: Rotor CAD file

OpenSCAD file describing the geometry of the rotor.

File Name: Supplementary Data 3

Description: Rotor STL file

STL geometry file of the rotor.
